CORRECTION

# Correction: Unveiling Undercover Cropland Inside Forests Using Landscape Variables: A Supplement to Remote Sensing Image Classification

Yohannes Ayanu, Christopher Conrad, Anke Jentsch, Thomas Koellner

There are errors in the first paragraph of the “Predicted undercover cropland” section of the Results. “Hectares per pixel” should read “m<sup>2</sup> per pixel.”

There are errors in [Fig 4](#) and in its caption. Please see the complete, correct [Fig 4](#) here.

There are errors in the caption for [S5 Fig](#). Please view the correct [S5 Fig](#) caption below.

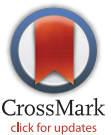

## OPEN ACCESS

**Citation:** Ayanu Y, Conrad C, Jentsch A, Koellner T (2015) Correction: Unveiling Undercover Cropland Inside Forests Using Landscape Variables: A Supplement to Remote Sensing Image Classification. PLoS ONE 10(8): e0137150. doi:10.1371/journal.pone.0137150

**Published:** August 25, 2015

**Copyright:** © 2015 Ayanu et al. This is an open access article distributed under the terms of the [Creative Commons Attribution License](#), which permits unrestricted use, distribution, and reproduction in any medium, provided the original author and source are credited.

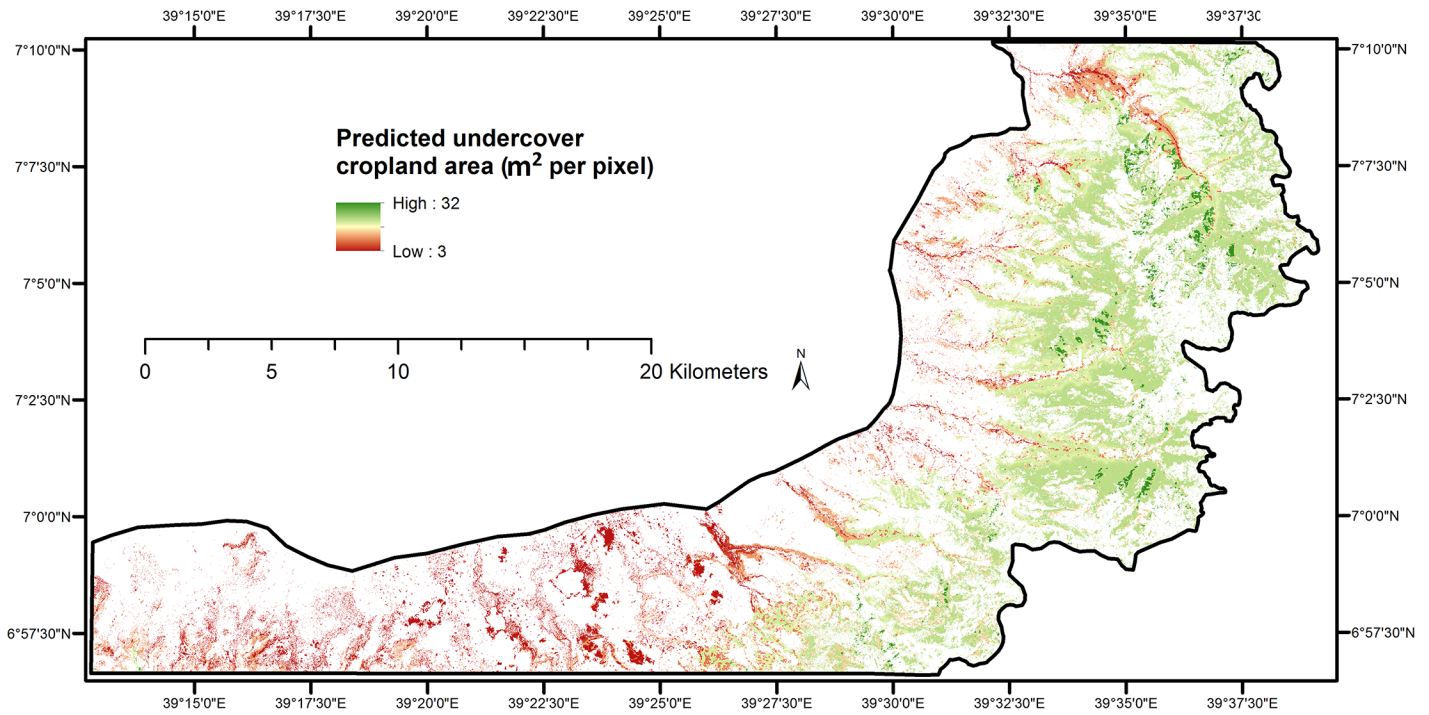

**Fig 4. Undercover cropland area predicted from most influential topographic factors identified using Boosted Regression Trees. (pixel size of 100 m<sup>2</sup>)**

doi:10.1371/journal.pone.0137150.g001

## Supporting Information

**S5 Fig. Predicted undercover cropland in m<sup>2</sup> per pixel.** Prediction using only most influential factors slope, elevation and east aspect (**Fig a**). Prediction using all topographic factors slope, elevation, east aspect, west aspect, south aspect and north aspect (**Fig b**). Pixel size is 100 m<sup>2</sup>. (PDF)

## Reference

1. Ayanu Y, Conrad C, Jentsch A, Koellner T (2015) Unveiling Undercover Cropland Inside Forests Using Landscape Variables: A Supplement to Remote Sensing Image Classification. PLoS ONE 10(6): e0130079. doi: [10.1371/journal.pone.0130079](https://doi.org/10.1371/journal.pone.0130079) PMID: [26098107](https://pubmed.ncbi.nlm.nih.gov/26098107/)
